# Supplementary material
Source: PubMed Central journal article supplement (PMC5064825)
Supplement: NIHMS777329-supplement-13423_2016_1038_MOESM1_ESM.pdf [file NIHMS777329-supplement-13423_2016_1038_MOESM1_ESM.pdf]

Supplementary material 1 (recognition/recall trade-offs)

We examined the relationship between recall performance and probe recognition performance across our participants by plotting recognition performance as a function of recall performance. As can be seen in the Figure below, in none of the four experiment did we observe a recall/probe recognition trade-off. In all four experiments, we observed that people who had better recall scores also had better recognition scores. This seems to go against the idea that some people might give priority to the recall task, to the detriment of probe recognition, while others would give priority to the probe recognition task, to the detriment of recall performance. Instead, the observed pattern is consistent with the idea that the sources underlying recall performance are the same as the sources underlying recognition performance such that a better memory representation results in both better probe recognition and better recall performance.

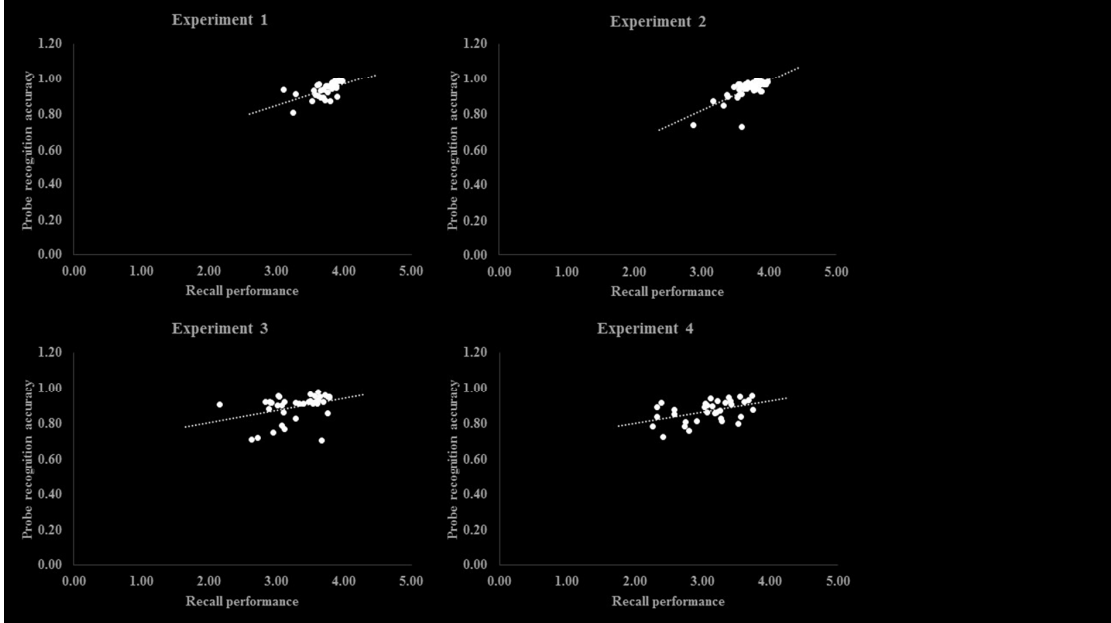

Footnote 1: We thank an anonymous reviewer for this suggestion.
